# Supplementary material for: circ-BPTF serves as a miR-486-5p sponge to regulate CEMIP and promotes hypoxic pulmonary arterial smooth muscle cell proliferation in COPD: Hpoxia induces circ-BPTF/miR-486-5p/CEMIP axis in COPD
Source: PubMed Central journal article supplement — Acta Biochim Biophys Sin (Shanghai). 2022 Dec 9;55(3):438–48. doi: 10.3724/abbs.2022178 (PMC10160238; doi:10.3724/abbs.2022178), 2022-12-09
Supplement: 169Table1-2.pdf [file 169Table1-2.pdf]

**Table 1. Sequence of Primers sequences used in this study were as follows:**

| Name                                    | Primer sequence (5'→3')   |
|-----------------------------------------|---------------------------|
| hsa_circ_0004893(F)                     | GTTGCAGGATTGGGAAGGTT      |
| hsa_circ_0004893(R)                     | CAGTCTCGGTGTCCAGGAGT      |
| hsa_circ_0002970(F)                     | AGACGAAAGGGGAGGTTATGA     |
| hsa_circ_0002970(R)                     | TGCAGGTACATTGGTTTCCC      |
| hsa_circ_0008199(F)                     | AGAATAAAGATAACCAAGACAAGAG |
| hsa_circ_0008199(R)                     | TTGCGAAGACACCTGAAGC       |
| hsa_circ_0045462(circ-BPTF) (F)         | CCTGTGATGGTACAGCCAGAAA    |
| hsa_circ_0045462(circ-BPTF) (R)         | TGGTGCTGGTTGTACTIONGCTTGT |
| Negative control siRNA (NC-siRNA) (F)   | UUCUCCGAACGUGUCACGUTT     |
| Negative control siRNA (NC-siRNA) (R)   | ACGUGACACGUUCGGAGAATT     |
| Negative control mimics (NC-mimics) (F) | UUCUCCGAACGUGUCACGUTT     |
| Negative control mimics (NC-mimics) (R) | ACGUGACACGUUCGGAGAATT     |
| miR-486-5p sense                        | GATGCACATCCTGTACTGAGCTG   |
| miR-486-5p antisense                    | TATGGTTGTTACGACTCCTTCAC   |
| <i>U6</i> sense                         | CTCGCTTCGGCAGCACA         |
| <i>U6</i> antisense                     | CTCGCTTCGGCAGCACA         |
| <i>CEMIP</i> sense                      | CCAGGAATGTTGAATGTCT       |
| <i>CEMIP</i> antisense                  | ATTGGCTCTTGGTGAATG        |
| <i>GAPDH</i> (F)                        | AATCCCATCACCATCTTC        |
| <i>GAPDH</i> (R)                        | AGGCTGTTGTCATACTTC        |

**Table 2. Baseline characteristics of all patients**

|                         | COPD (n=18) | non-COPD (n=13) | <i>P</i> value |
|-------------------------|-------------|-----------------|----------------|
| M/F (n)                 | 13/5        | 9/4             | 0.85           |
| Age (years)             | 64.20±9.82  | 57.07±12.18     | 0.09           |
| Smoker (n)              | 4           | 2               | 0.65           |
| FEV1/pred (%)           | 73.65±11.59 | 94.87±11.13     | <0.01          |
| FEV1/FVC (%)            | 60.52±8.75  | 79.13±7.04      | <0.01          |
| PaO <sub>2</sub> (mmHg) | 69.3±6.2    | 82.6±5.2        | <0.01          |
